# Supplementary material for: Association of microRNAs with Types of Leaf Curvature in Brassica rapa
Source: PubMed Central journal article supplement (PMC5808167; doi:10.3389/fpls.2018.00073), 2018-02-06
Supplement: Image1.pdf [file Image1.pdf]

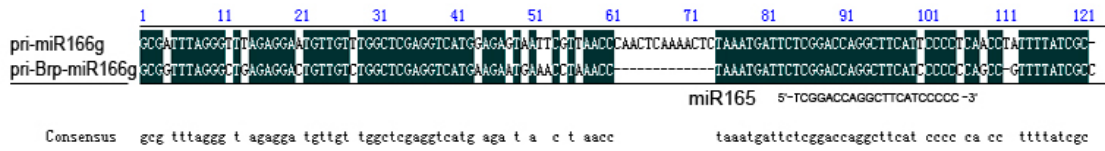

**Supplemental Fig. S1:** Alignment of pri-Brp-miR166g in *B. rapa* with pri-miR166g in *Arabidopsis*.
