# Supplementary material for: Association of microRNAs with Types of Leaf Curvature in Brassica rapa
Source: PubMed Central journal article supplement (PMC5808167; doi:10.3389/fpls.2018.00073), 2018-02-06
Supplement: Image2.pdf [file Image2.pdf]

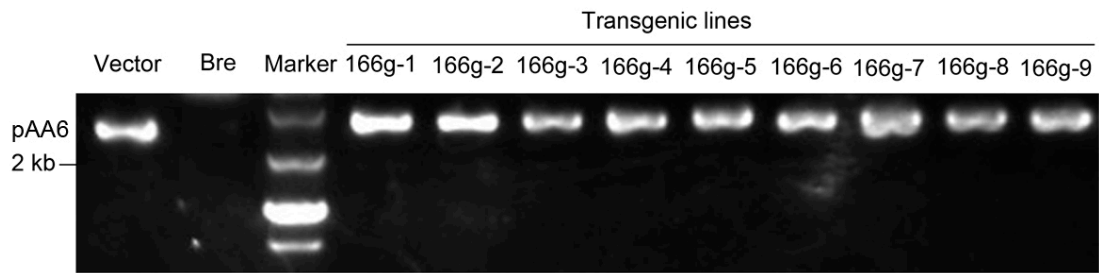

**Supplemental Fig. S2:** PCR detection of AA6 promoter in the transgenic lines of heading Chinese cabbage carrying *pAA6::Brp-MIR166g*.
